# Supplementary material for: Nanoparticle‐Mediated Simultaneous Targeting of Mitochondrial Injury and Inflammation Attenuates Myocardial Ischemia‐Reperfusion Injury
Source: PubMed Central journal article supplement — J Am Heart Assoc. 2021 May 29;10(12):e019521. doi: 10.1161/JAHA.120.019521 (PMC8477875; doi:10.1161/jaha.120.019521), 2021-05-29
Supplement: JAH3-10-e019521-s001.pdf [file JAH3-10-e019521-s001.pdf]

# **Supplemental Material**

**Figure S1. The area at risk as a percentage of the left ventricle (LV).**

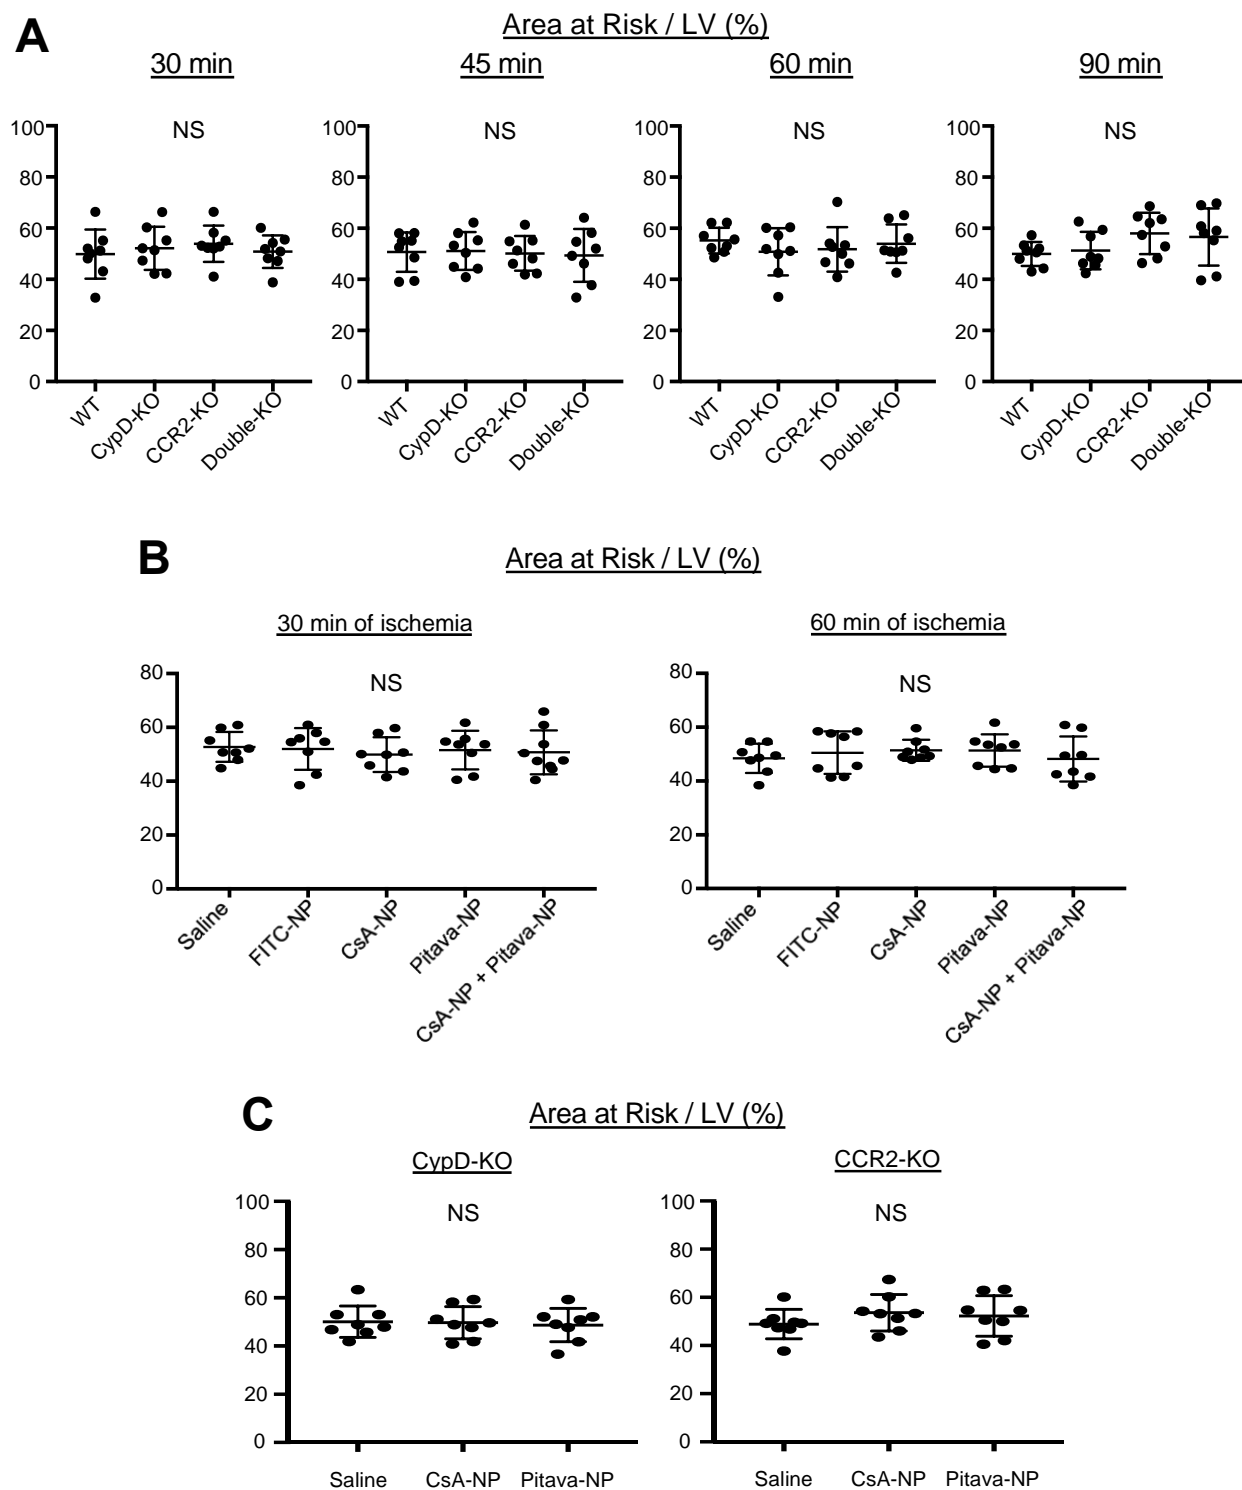

Each bar represents the mean  $\pm$  SD. **A.** N=8/group, 1-way ANOVA. **B.** N = 8-9/group, 1-way ANOVA. **C.** N=8/group, 1-way ANOVA.
